# Supplementary material for: Rab26 suppresses migration and invasion of breast cancer cells through mediating autophagic degradation of phosphorylated Src
Source: PubMed Central journal article supplement (PMC7969620; doi:10.1038/s41419-021-03561-7), 2021-03-17

Rab26 suppresses migration and invasion of breast cancer cells through  
mediating autophagic degradation of phosphorylated Src

Huiying Liu et al

The original Western blots Data

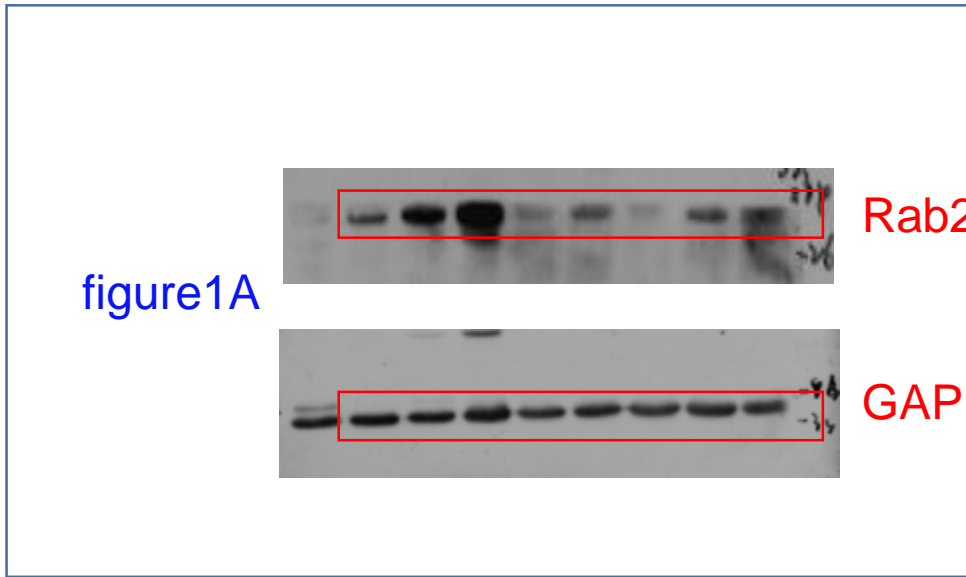

two figures share one  
internal reference

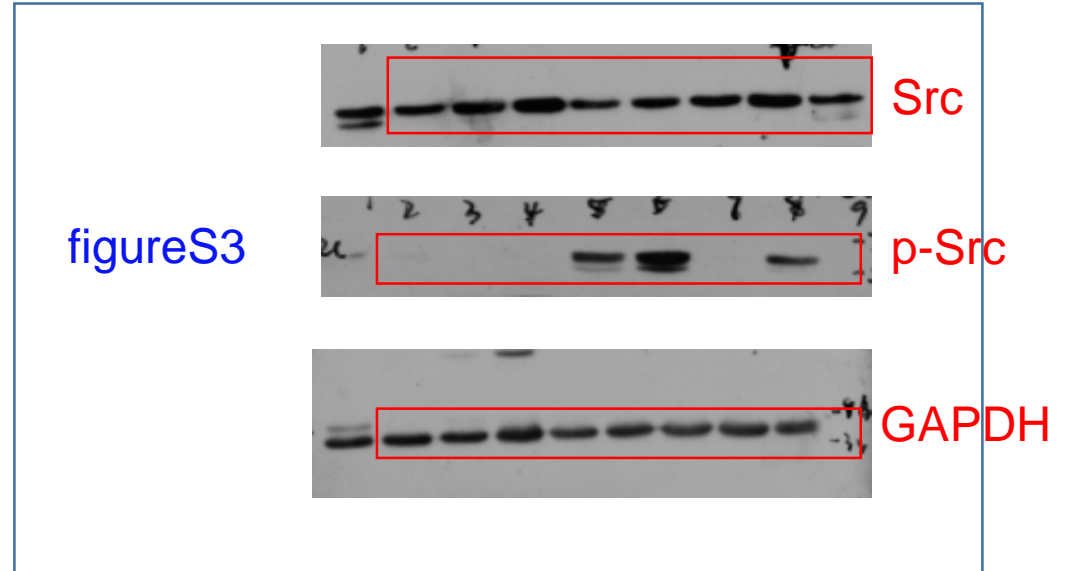

figureS1B

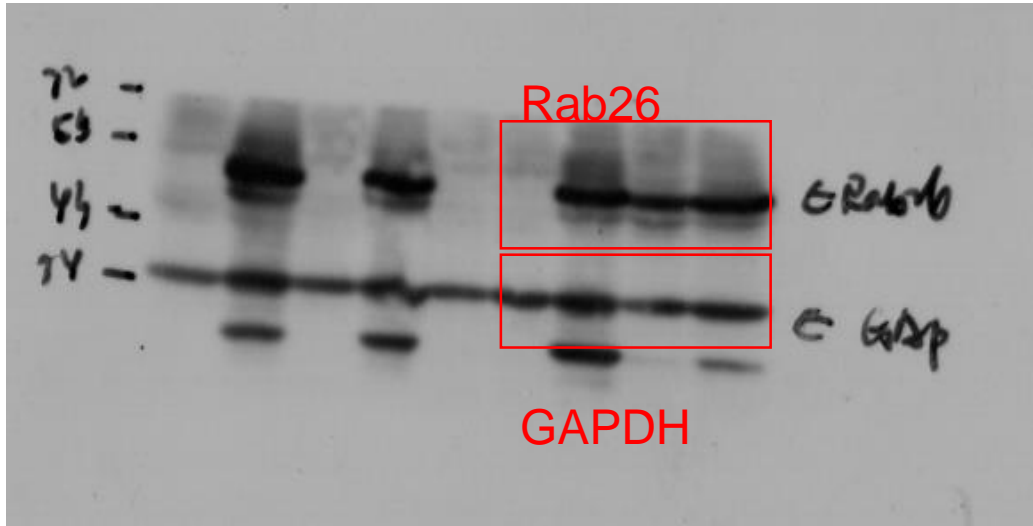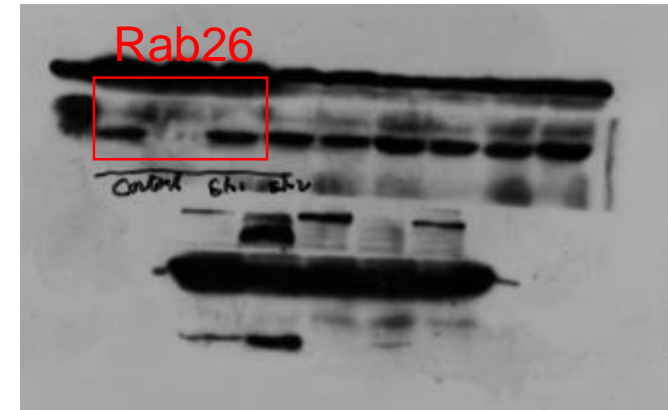

figure2A

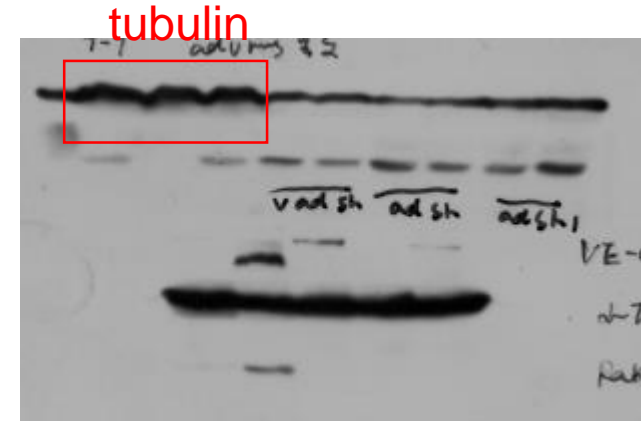

figure4B

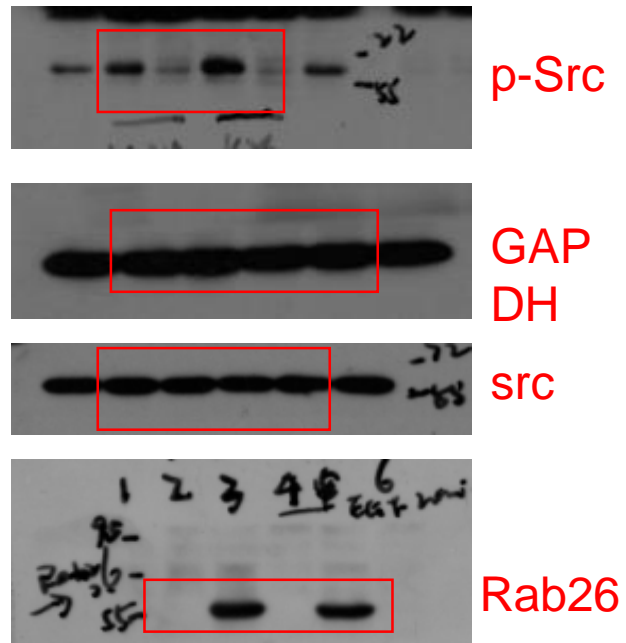

figure4D

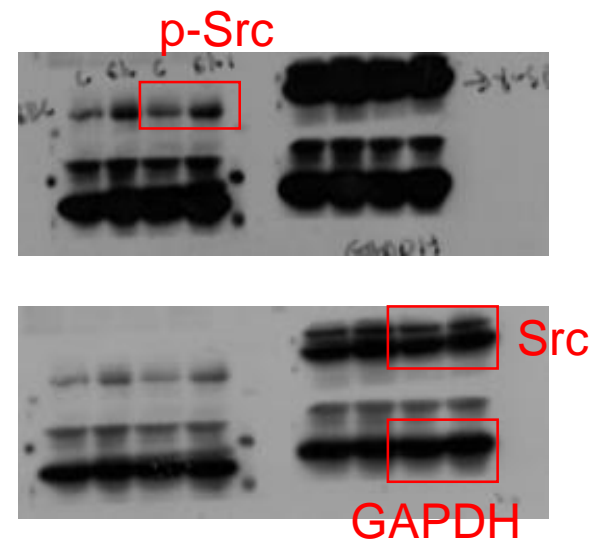

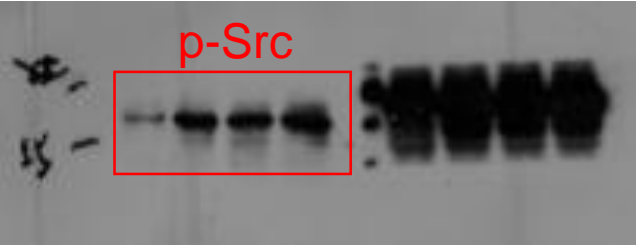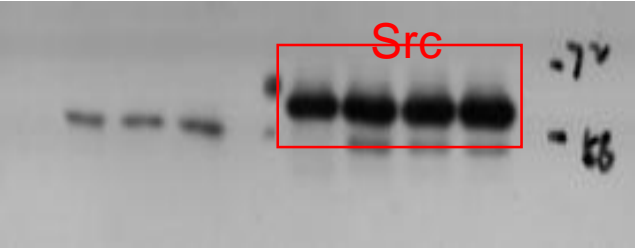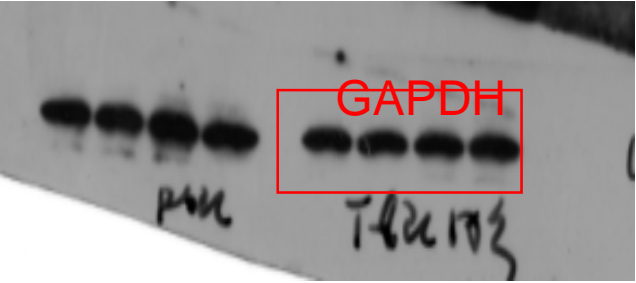

figure5A

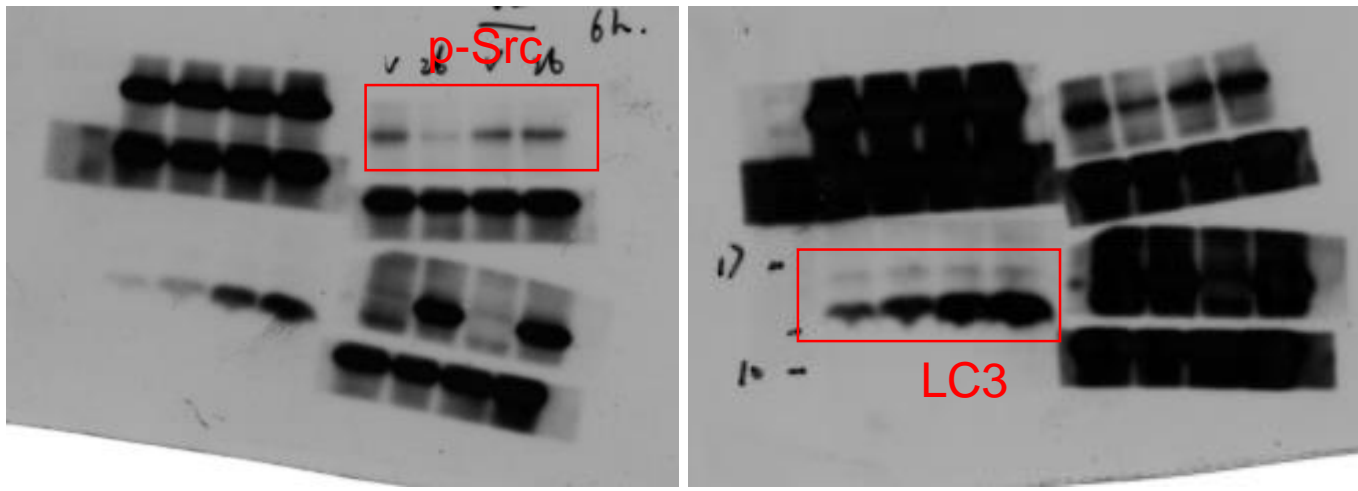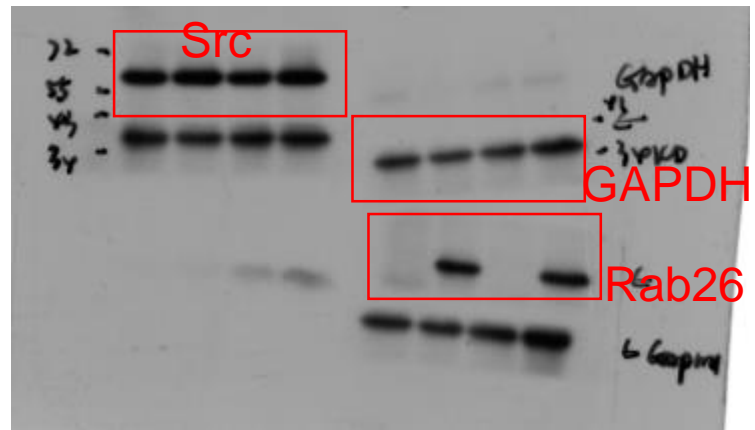

figure6E

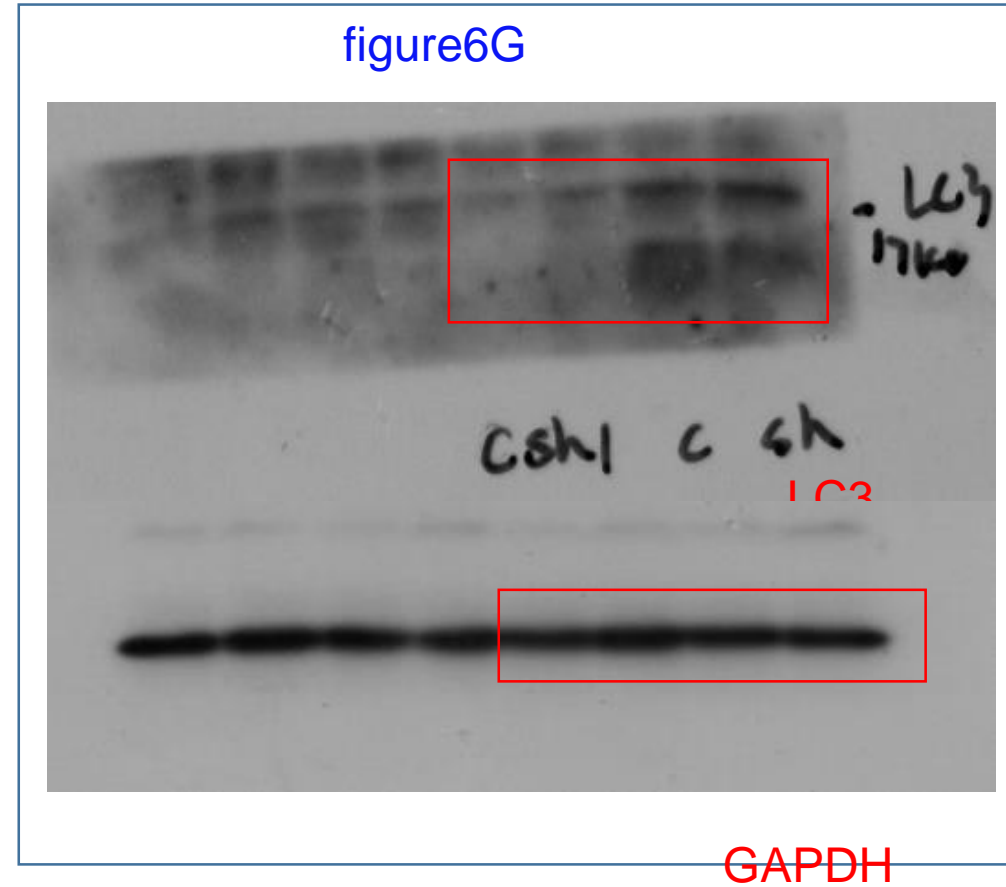

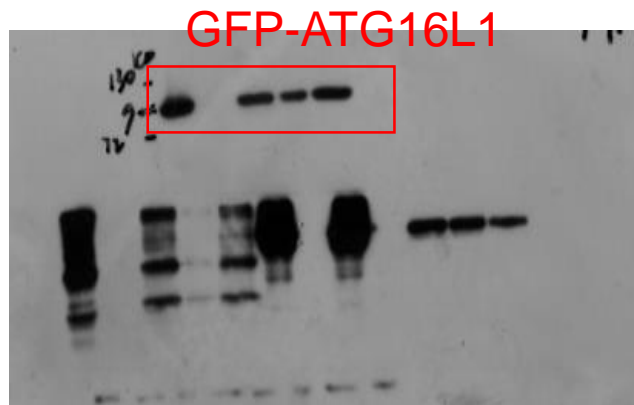

figure7A

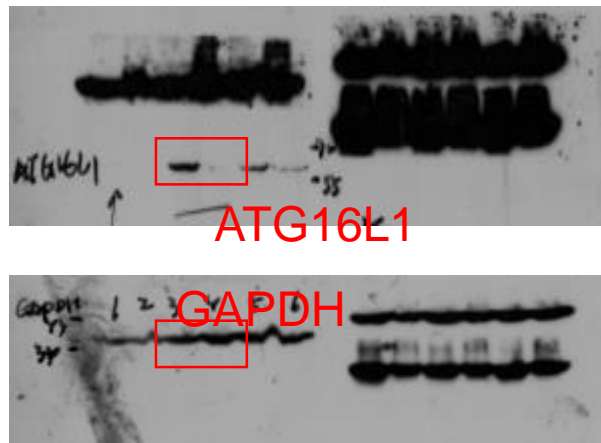

figure7B

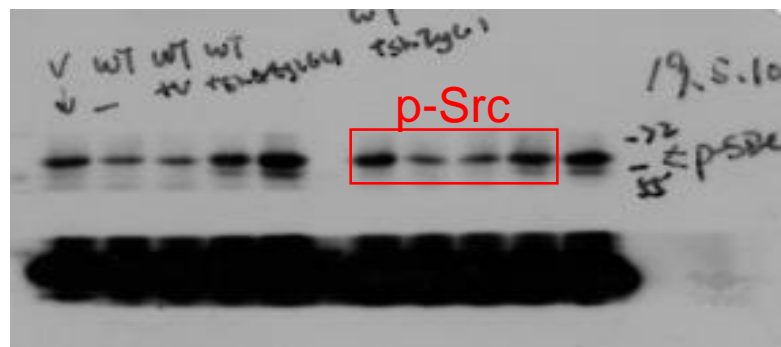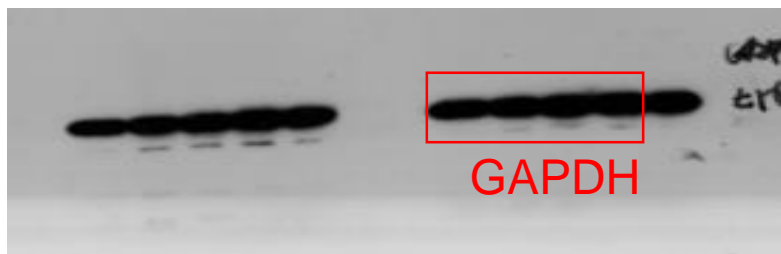

figure7C

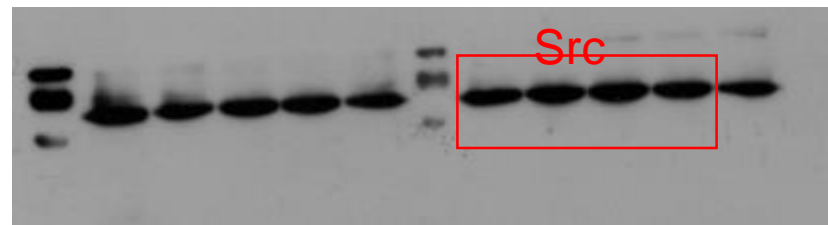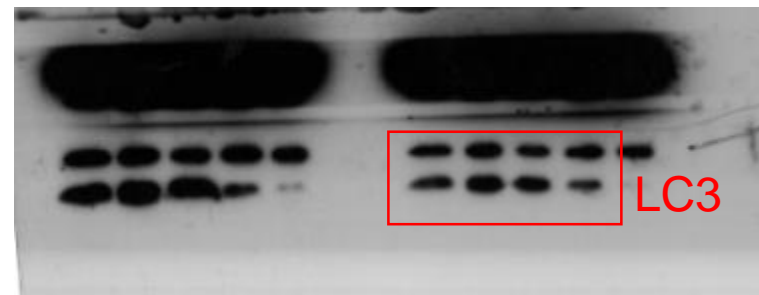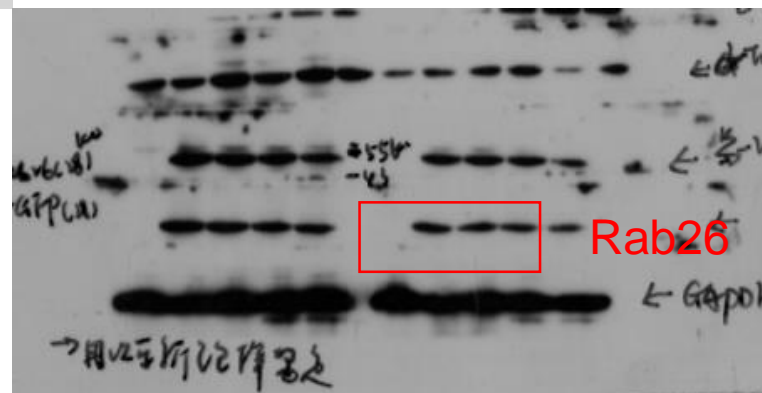

figure8F

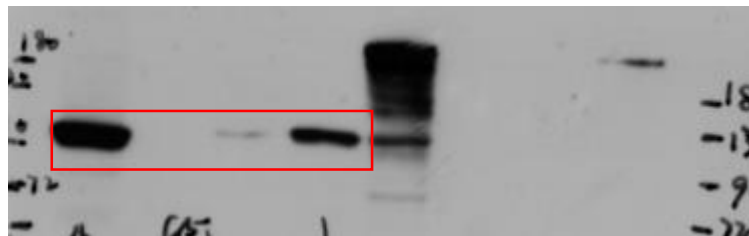

GFP-ATG16L1

figure8.H

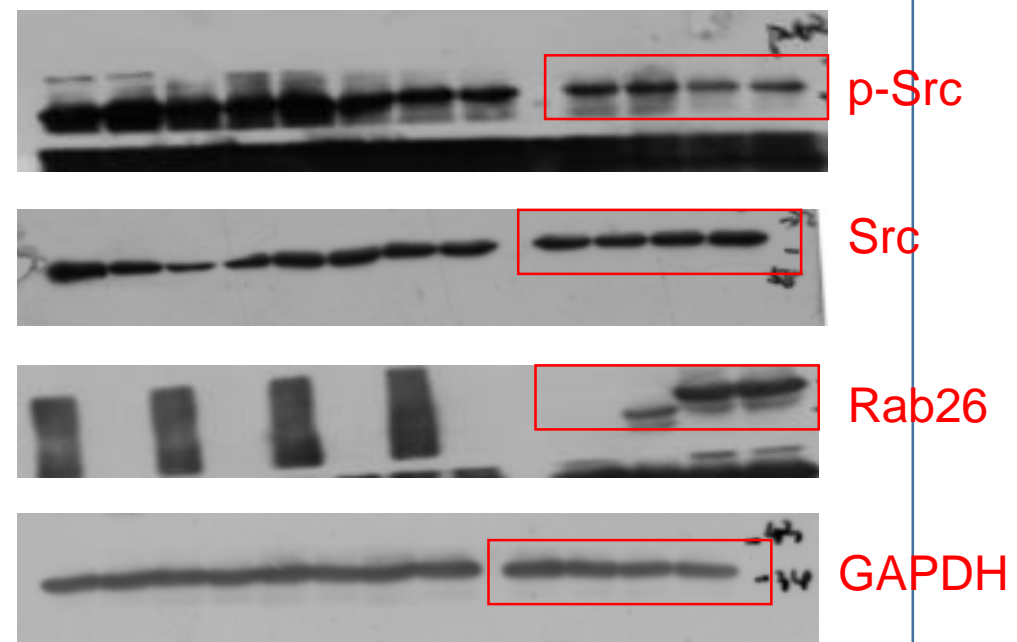

Supplement: 41419_2021_3561_MOESM6_ESM.pdf [file 41419_2021_3561_MOESM6_ESM.pdf]
